# Supplementary material for: Chemical oxidation of endohedral metallofullerenes: identification and separation of distinct classesElectronic supplementary information (ESI) available: identification and separation of different classes. See http://www.rsc.org/suppdata/cc/b3/b301565c/
Source: Royal Society of Chemistry journal article supplement (doi:10.1039/b301565c), 2003-01-01
Supplement: b301565c.pdf [file b301565c.pdf]

## Supplementary Information

### Chemical oxidation of endohedral metallofullerenes: identification and separation of distinct classes

Robert D. Bolskar\* and J. Michael Alford  
TDA Research, Inc., 12345 West 52<sup>nd</sup> Avenue, Wheat Ridge, CO 80033, USA.

**General** Gd(NO<sub>3</sub>)<sub>3</sub>•6H<sub>2</sub>O and Tm(NO<sub>3</sub>)<sub>3</sub>•6H<sub>2</sub>O (each 99.9%) were purchased from Strem Chemicals and used as received. All other chemicals were purchased from Sigma-Aldrich and used as received. Solvents were distilled and dried under inert atmosphere according to standard procedures. Inert atmosphere manipulations were conducted inside a Vacuum Atmospheres glovebox under argon (O<sub>2</sub>, H<sub>2</sub>O < 5 ppm). Mass spectrometry was performed with a custom built laser-desorption combination linear and reflectron time-of-flight mass spectrometer. UV-Vis-NIR spectra were recorded using a Perkin-Elmer Lambda 19 spectrometer.

**Arc Fullerene Production of Mixed C<sub>2n</sub>/Gd@C<sub>2n</sub>.** Gd<sub>2</sub>O<sub>3</sub> impregnated graphite rods (1/4" diameter Poco Graphite, 40% porosity) doped to a level of ca. 1% Gd were produced according to published procedures (D. W. Cagle, T. P. Thrash, M. Alford, L. P. F. Chibante, G. J. Ehrhardt and L. J. Wilson, *J. Am. Chem. Soc.*, 1996, **118**, 8043). The graphite rods were first evacuated (~ 1 Torr) then soaked in a saturated absolute ethanolic solution of Gd(NO<sub>3</sub>)<sub>3</sub>•6H<sub>2</sub>O for 30 min. The solution-saturated rods were air dried and then heated in a quartz furnace at ca. 850°C under vacuum for 3 hours, converting the metal nitrate to the oxide. Gd-containing fullerene soot was generated by the standard direct current (DC) arc-discharge of Gd<sub>2</sub>O<sub>3</sub>-impregnated 6" graphite rods (ca. 7.75 g per rod) using a custom-built arc apparatus, operating at 150 Torr of helium. Cathode deposit "back-burning" (reverse-polarity arcing) was employed to maximize the yield of fullerenes and metallofullerenes. This consists of periodically briefly reversing the arc polarity so as to arc the solid deposits of material formed on the cathode (relative to the original polarity). Anaerobic sublimation of the raw arc-produced soot onto an isolated, water-cooled cold finger inside of the arc chamber at 750°C separated the fullerenes (a mixture of soluble and insoluble empty fullerenes and Gd@C<sub>2n</sub> endohedral metallofullerenes) from the non-fullerene carbon soot. Approximately 2.5 g of sublimed fullerenes (the "sublimate") per ten-rod arc run was obtained. Tm@C<sub>2n</sub> material was arc-generated in a similar fashion.

**Separation of the Gd@C<sub>60</sub> fraction.** The sublimable Gd@C<sub>2n</sub> species have been identified as belonging to at least three distinct classes and separated according to the processes outlined in Scheme 1. Anaerobically collected sublimate, approximately 2.5 g per ten rod arc run (with Gd-impregnated rods) was exhaustively extracted with *o*-dichlorobenzene inside of a glovebox using a continuous-cycling Soxhlet extractor operating at 40 torr and 100°C, until the washings were almost colorless. This removed essentially all of the dissolvable soluble fullerenes, including C<sub>60</sub>, C<sub>70</sub>, etc. and soluble Gd@C<sub>82</sub>, which were saved for separation of the Gd@C<sub>82</sub>. The Gd@C<sub>60</sub> class of endohedral fullerenes, other Gd@C<sub>2n</sub> and the small-bandgap fullerene C<sub>74</sub> dominates the remaining insoluble material.

**Branch 1. Separation of the ODCB-insoluble oxidizable Gd@C<sub>2n</sub> class (2n ≥ 72).** ODCB-rinsed insoluble material from above was suspended in CH<sub>2</sub>Cl<sub>2</sub> with vigorous stirring. To this was added the oxidant tris(4-bromophenyl)aminium hexachoroantimonate (*E*<sup>o</sup> ~ +0.7 V for tris(4-bromophenyl)amine, vs the Fc/Fc<sup>+</sup> couple) in dichloromethane with stirring, quickly forming a dark brown solution. Periodic measurement of the UV-Vis spectrum of this solution reveals the end point of oxidant addition by monitoring for the persistence of the absorbance of the aminium radical cation ( $\lambda_{\text{max}} = 730 \text{ nm}$ ), after which the reaction mixture is stirred for additional period (ca. 30 min). The solution is filtered with a 0.45 $\mu\text{m}$  PTFE syringe filter (setting aside the insolubles for use in the next step) and CH<sub>2</sub>Cl<sub>2</sub> is removed under vacuum. The solids are then redissolved in ODCB and recrystallized by hexane addition; filtration isolates the mixed [Gd@C<sub>2n</sub><sup>+</sup>][SbCl<sub>6</sub><sup>-</sup>] salts, 72 ≤ 2n ≤ 106. Separable yields of salts of the Gd@C<sub>2n</sub><sup>+</sup> class (72 ≤ 2n ≤ 106) vary, and are on the order of tens of mg for oxidative extraction of 500 mg of ODCB-washed sublimate material. Alternatively, silver salts (e.g. Ag<sup>+</sup> salts of weakly coordinating anions, such as PF<sub>6</sub><sup>-</sup>, SbCl<sub>6</sub><sup>-</sup>, etc.) can be used as an oxidant, but the Ag<sub>(s)</sub> reduction by-product is then mixed into the insoluble Gd@C<sub>60</sub> etc. material.

**Branch 2. The ODCB-Insoluble Gd@C<sub>60</sub> Class.** The Gd@C<sub>60</sub>-class of fullerenes remains insoluble in ODCB after the Soxhlet extraction and the above oxidative treatment; this material, in addition to Gd@C<sub>60</sub>, Gd@C<sub>70</sub>, Gd@C<sub>74</sub> and small amounts of other Gd@C<sub>2n</sub> (2n > 72) also contains the empty, small-bandgap fullerene C<sub>74</sub> (along with small amounts of other misc. empty C<sub>2n</sub>). Depletion of the empty small-bandgap fullerene C<sub>74</sub> and other Gd@C<sub>2n</sub> (2n ≥ 72) from this material is accomplished by treatment with excess AlCl<sub>3</sub> (E° approximately +1 V) in ODCB, producing a dark brown solution. The insolubles were collected by filtration, rinsed with ODCB and dichloromethane (to remove excess AlCl<sub>3</sub>) followed by hexane rinsing, and then dried under vacuum. This process depleted the content of C<sub>74</sub> by ca. 50% (see Fig. S1). The resulting material is composed of the Gd@C<sub>60</sub>-dominated fraction of fullerenes, including chiefly Gd@C<sub>60</sub> with smaller amounts of Gd@C<sub>70</sub>, Gd@C<sub>74</sub>, other higher Gd@C<sub>2n</sub> and C<sub>74</sub> (with negligible amounts of C<sub>60</sub> and C<sub>70</sub>, small amounts of which may be physically trapped in the solid matrix of insoluble Gd@C<sub>60</sub>).

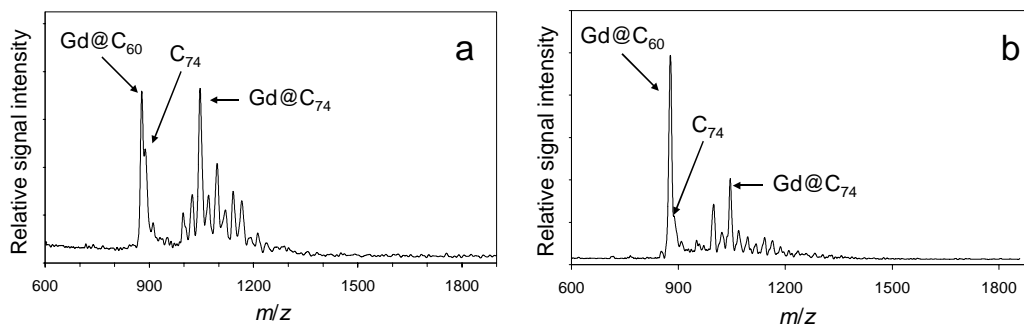

**Fig. S1** (a) LD-TOF mass spectrum of the ODCB-insoluble Gd@C<sub>60</sub> class prior to AlCl<sub>3</sub> treatment. (b) LD-TOF mass spectrum of the ODCB-insoluble Gd@C<sub>60</sub> class after AlCl<sub>3</sub> treatment.

**Branch 3. ODCB-Solubles: Oxidative Separation of Gd@C<sub>82</sub> fraction from soluble empty C<sub>2n</sub>.** The ODCB solvent is removed from the soluble fullerenes under reduced pressure. The resulting solid mixture of fullerenes is dispersed in CH<sub>2</sub>Cl<sub>2</sub>, to which is added excess AgSbF<sub>6</sub>. After stirring for ca. 2 hours, the solubles are filtered, and the CH<sub>2</sub>Cl<sub>2</sub> is removed from the filtrate under reduced pressure. These solids (containing a mixture of [Gd@C<sub>82</sub><sup>+</sup>][SbF<sub>6</sub><sup>-</sup>] and traces of empty C<sub>2n</sub> species) are stirred overnight with a 1:1 toluene:hexane mixture, filtered, rinsed with hexane and dried under reduced pressure. The near-infrared electronic spectrum of this Gd@C<sub>82</sub><sup>+</sup> material confirms its oxidized nature (λ<sub>max</sub> = 1280 nm, ODCB solution), in agreement with previous measurements on electrochemically generated Ln@C<sub>82</sub><sup>+</sup> species. The mass spectrum of this material (Fig. S2) reveals small amounts of empty higher C<sub>2n</sub> fullerenes and other Gd@C<sub>2n</sub> species (likely also oxidized by the aminium oxidant) present in this non-chromatographed material. 10 mg of enriched Gd@C<sub>82</sub><sup>+</sup> material can be generated from 300 mg of starting material in this process. Optionally, the Gd@C<sub>82</sub><sup>+</sup> salt can be reduced with decamethylferrocene and recrystallized to generate enriched Gd@C<sub>82</sub>.

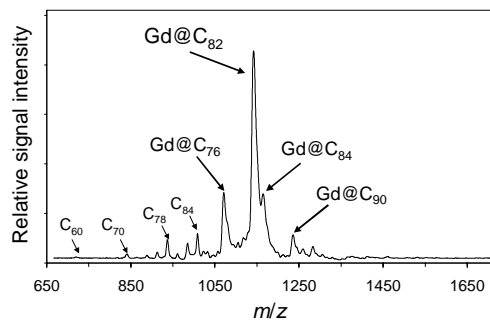

**Fig. S2** LD-TOF mass spectrum of the oxidatively-separated Gd@C<sub>82</sub><sup>+</sup>-dominated material.

**Oxidizable Tm@C<sub>2n</sub> Class.** Tm@C<sub>2n</sub>-containing fullerene sublimate was produced by the arc method and sublimed according to the procedure described for Gd@C<sub>2n</sub> sublimate above. The sublimate was stirred in ODCB for several days (this removed most soluble C<sub>2n</sub> and Tm@C<sub>2n</sub>, etc.), after which the insolubles were filtered off and rinsed with hexane. The insolubles were treated with excess AgPF<sub>6</sub> in ODCB for 12 hours. The resulting dark brown solution was filtered with a 0.45μm PTFE syringe filter and added dropwise to stirring hexane, inducing immediate precipitation. This precipitate containing Tm@C<sub>60</sub><sup>+</sup> and Tm@C<sub>70</sub><sup>+</sup> was collected by filtration, rinsed with hexanes and dried under reduced pressure. The Ag<sup>+</sup> oxidation dissolves only a portion of the ODCB-insoluble Tm@C<sub>2n</sub> sublimate (less than 50%, varying with conditions).
